# Supplementary material
Source: PubMed Central journal article supplement (PMC6638799)
Supplement: MPP-15-767-s008.pdf [file MPP-15-767-s008.pdf]

| Viroid     | Starting Nucleotide | Primer Name                            | Sequence (5'-3')                                |
|------------|---------------------|----------------------------------------|-------------------------------------------------|
| PLMVd (+)  | 91                  | T7_PLMVd_F                             | TAATACGACTCACTATAGGTGCCCTATTCGGAGCACTGCAG       |
|            |                     | PLMVd_R                                | CCAAGGTGGAGGGGCTGAGA                            |
|            | 157                 | T7_PLMVd_F2                            | TAATACGACTCACTATAGGACTTTTCCCTAGGGTTTGAGCGG      |
|            |                     | PLMVd_R2                               | CACCTTACGTCATTGCGAGGTGC                         |
| 256        | T7_PLMVd_F3         | TAATACGACTCACTATAGGTCCCCCTCAGAGGTGACTC |                                                 |
|            | PLMVd_R3            | GGGTTTGAATCCCGGGTAG                    |                                                 |
| PLMVd (-)  | 97                  | T3_PLMVd(-)_R                          | AATTAACCCTCACTAAAGGGTAGGCGTCGTAATCCAGTTTC       |
|            |                     | PLMVd(-)_F                             | GGGATTCAAACCCGGTCCCC                            |
|            | 269                 | T3_PLMVd(-)_R2                         | AATTAACCCTCACTAAAGGTAACCACTCTCTCATAAGTCTGG      |
|            |                     | PLMVd(-)_F2                            | TCTCAGCCCCCTCCACCTTGG                           |
| GHVd (+)   | 112                 | T7_GHVd_F                              | TAATACGACTCACTATAGGACTTTTGTCTCGTCAGAG           |
|            |                     | GHVd_R                                 | GAATCCGTGGTACCCCTAACGC                          |
|            | 259                 | T7_GHVd_F2                             | TAATACGACTCACTATAGGGGGAAGGTTAGCTGCCATTCTTG      |
|            |                     | GHVd_R2                                | GGAGGAGGCTTCTCCGAAGTCCCC                        |
| GHVd (-)   | 172                 | GHVd (-)F2                             | ACGAAGTTTAACTTCGTAAGTCG                         |
|            |                     | T3_GHVd_R2                             | AATTAACCCTCACTAAAGGGAAAAGGTTACCGGCTAAGGC        |
|            | 372                 | GHVd (-)F                              | GTGGAGAATAGTTCCACCTCTCGCC                       |
|            |                     | T3_GHVd_R                              | AATTAACCCTCACTAAAGGTCAGTCACTGTGTAGTGGCTCTG      |
| CChMVd (+) | 71                  | T7_CChMVd_F                            | TAATACGACTCACTATAGGGAGTAAAGCTTTCGCTCTCTCC       |
|            |                     | CChMVd_R                               | GCACAAGCCGAATCTGGAAGA                           |
|            | 205                 | T7_CChMVd_F2                           | TAATACGACTCACTATAGGGACCCGGAACAGATCCAGTTC        |
|            |                     | CChMVd_R2                              | AACCCCTTCTCCCGGGGTTGGAC                         |
| CChMVd (-) | 78                  | CChMVd(-)_F                            | TCTTCCAGATTCGGCTTGTGC                           |
|            |                     | T3_CChMVd_R                            | AATTAACCCTCACTAAAGGATTTCGATCCTGTGATGGATC        |
|            | 347                 | CChMVd(-)_F2                           | GTCCAACCCCGGAGGAAAGGGTT                         |
|            |                     | T3_CChMVd_R2                           | AATTAACCCTCACTAAAGGAGGTATTTACCTCTACTCCG         |
|            |                     | CChMVd(-)3_6FAM/NED                    | GGAACAGATCCAGTTCCGG                             |
| ELVd (+)   | 140                 | T7_ELVd_F                              | TAATACGACTCACTATAGGATCGGCGGATGTACCGATTTCGC      |
|            |                     | ELVd_R                                 | GTACTTACGCAAGTAAGGGATTGG                        |
|            | 268                 | T7_ELVd_F3                             | TAATACGACTCACTATAGGGTGAGTGTACCTCTTTTCG          |
|            |                     | ELVd_R3                                | TCCTAGGGAACACATCCTTG                            |
| ELVd (-)   | 84                  | ELVd_F                                 | CCAATCCCTTACTTTCGTAAGTAC                        |
|            |                     | T3_ELVd_R                              | AATTAACCCTCACTAAAGGGAAGAGCTTTGGAGGAACG          |
|            | 229                 | T3_ELVd_R3                             | AATTAACCCTCACTAAAGGAAGACCGGAGAAATCCGAAAAG       |
|            |                     | ELVd(-)F3                              | GAGAGAGACAGAGGACGGCCTCT                         |
| ASBVd (+)  | 26                  | T7_ASBVd_F3_G                          | TAATACGACTCACTATAGATTAAACTTTGTTTGACGAATCCAGG    |
|            |                     | ASBVd_R3                               | CATATCCTCACTTCTTGTCTAATAAAC                     |
|            | 114                 | T7_ASBVd_F4_G                          | TAATACGACTCACTATAGTTTTATTAATAAAATAGTTCACTCG     |
|            |                     | ASBVd_R4                               | GTTACCACGACTCCTCCTTCTCTC                        |
| ASBVd (-)  | 2                   | ASBVd(-)_F3                            | GTTTATTAGAACAAGAAGTGAGGATATG                    |
|            |                     | T3_ASBVd(-)_R3_G                       | AATTAACCCTCACTAAAGAAGATTTTGTAATAAAACAATGAAG     |
|            | 158                 | ASBVd(-)_F4                            | GAGAGAAGGAGGAGTCGTGGTGAAC                       |
|            |                     | T3_ASBVd(-)_R4_G                       | AATTAACCCTCACTAAAGACAAGTCGAATCTCAGAGTCGGAAAGTCG |

Figure S8  
Giguère et al.
